# Supplementary material for: A chiroptical binaphthopyran switch: amplified CD response in a polystyrene film
Source: Royal Society of Chemistry journal article supplement (doi:10.1039/c0nj00102c), 2010-01-01
Supplement: c0nj00102c.pdf [file c0nj00102c.pdf]

## Chiroptical binaphthopyran switch: amplified CD response in polystyrene film

Anna Kicková,<sup>a</sup> Jana Donovalová,<sup>b</sup> Peter Kasák<sup>c</sup> and Martin Putala\*<sup>a</sup>

<sup>a</sup> Department of Organic Chemistry, Faculty of Natural Sciences, Comenius University in Bratislava, Mlynská dolina, 842 15 Bratislava, Slovak Republic. Fax: 00421 2 60296 337; Tel: 00421 2 60296 323; E-mail: putala@fns.uniba.sk

<sup>b</sup> Chemistry Institute, Faculty of Natural Sciences, Comenius University in Bratislava, Mlynská dolina, 842 15 Bratislava, Slovak Republic. E-mail: donovalova@fns.uniba.sk

<sup>c</sup> Polymer Institute of the Slovak Academy of Sciences, Dúbravská cesta 9, 842 36 Bratislava, Slovak Republic. E-mail: upolgazo@savba.sk

### Supporting Information

#### Preparations

(*R*)-1,1'-Binaphthalene-2,2'-diol (**6**)<sup>S1,S2</sup>

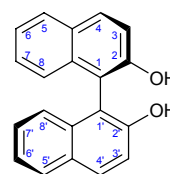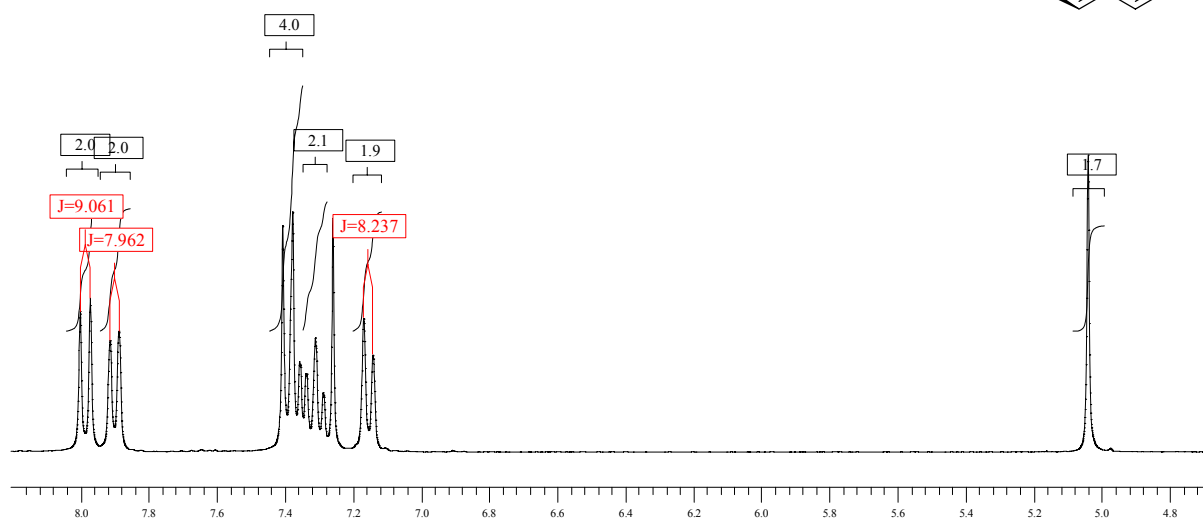

Fig. S1 <sup>1</sup>H NMR (300 MHz; CDCl<sub>3</sub>; Me<sub>4</sub>Si) of compound (*R*)-**6**.

<sup>1</sup>H NMR:  $\delta_{\text{H}}$ (300 MHz; CDCl<sub>3</sub>; Me<sub>4</sub>Si) 5.04 (2H, br s, 2 × OH), 7.16 (2H, d, *J* 8.2, C(8)H, C(8')H), 7.31 (2H, ddd, *J* 1.4 6.9 and 8.2, C(7)H, C(7')H), 7.35-7.41 (4H, m, C(3)H, C(3')H and C(6)H, C(6')H), 7.90 (2H, d, *J* 8.0, C(5)H, C(5')H), 7.99 (2H, d, *J* 9.1, C(4)H, C(4')H).

mp 206-208 °C (from benzene) (lit.<sup>S1</sup> 206-207 °C).

$[\alpha]_{\text{D}}^{22} + 35.4$  (*c* 1 in THF) (lit.<sup>S2</sup> +35.4 (*c* 1 in THF)).

>99.9% *ee* (Chiralcel Daicel OD-H column, hexane-isopropyl alcohol (90:10), temperature 21 °C, flow rate 0.75 mL/min, pressure 27.5 bar,  $\lambda = 275$  nm:  $t_1 = 22.34$  min (*S*)-**6**;  $t_2 = 25.69$  min (*R*)-**6**).

**(R)-2,2'-Dimethoxy-1,1'-binaphthalene**<sup>S3</sup>

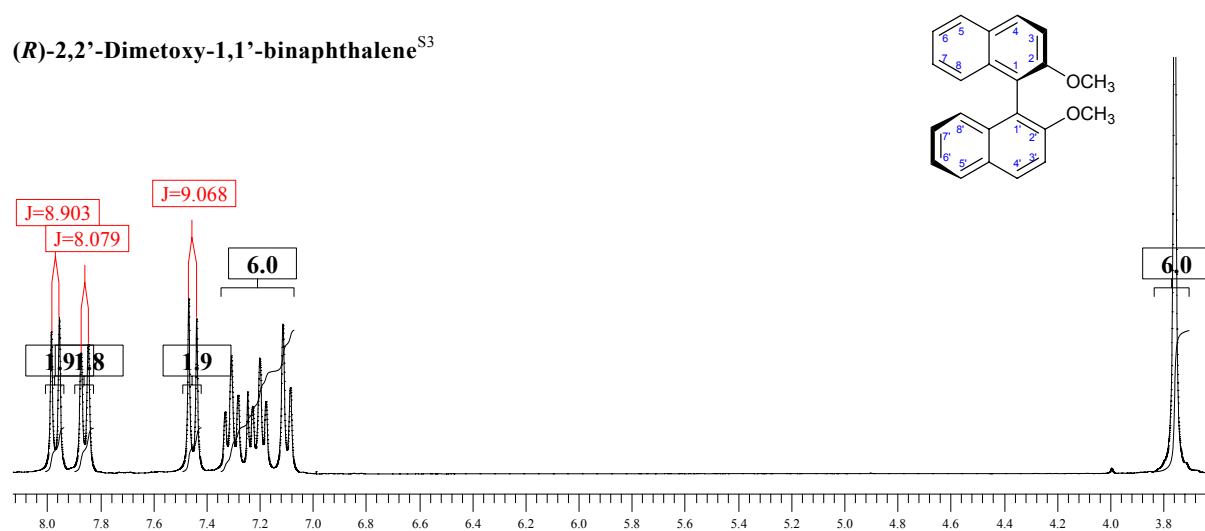

**Fig. S2** <sup>1</sup>H NMR(300 MHz; CDCl<sub>3</sub>; Me<sub>4</sub>Si) of (R)-2,2'-dimethoxy-1,1'-binaphthalene.

<sup>1</sup>H NMR:  $\delta_{\text{H}}$ (300 MHz; CDCl<sub>3</sub>; Me<sub>4</sub>Si) 3.76 (6H, s, 2 × OCH<sub>3</sub>), 7.10 (2H, d, *J* 8.4, C(8)*H*, C(8')*H*), 7.20 (2H, ddd, *J* 1.3 6.8 and 8.1, C(6)*H*, C(6')*H*), 7.31 (2H, ddd, *J* 1.3 6.8 and 8.1, C(7)*H*, C(7')*H*), 7.45 (2H, d, *J* 9.1 Hz, C(4)*H*, C(4')*H*), 7.86 (2H, d, *J* 8.1 Hz, C(5)*H*, C(5')*H*), 7.97 (2H, d, *J* 8.9, C(3)*H*, C(3')*H*).  
mp 224-226 °C (lit.<sup>S3</sup> 224-225 °C).

**(R)-3,3'-Diiodo-2,2'-dimethoxy-1,1'-binaphthalene**<sup>S4,S5</sup>

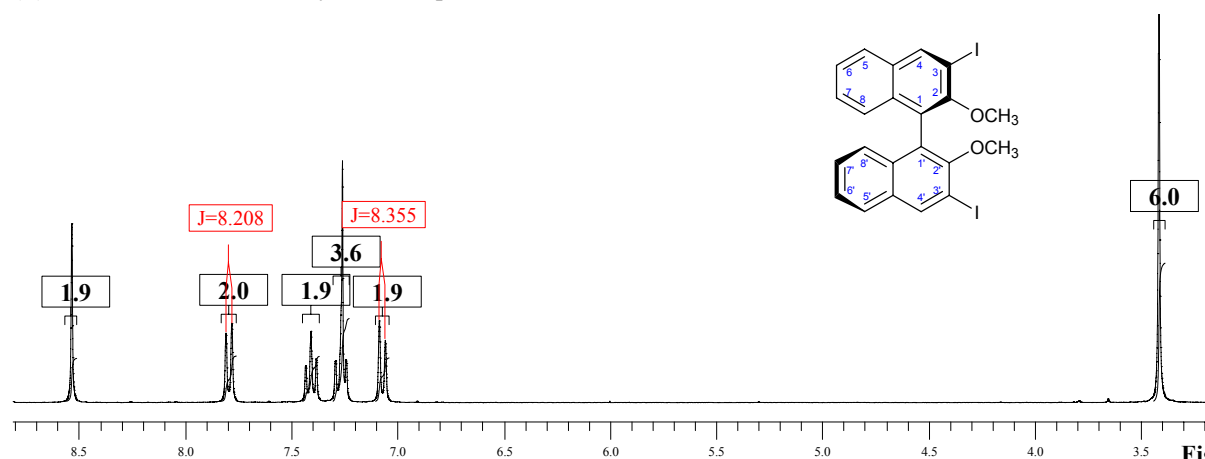

**Fig. S3** <sup>1</sup>H NMR(300 MHz; CDCl<sub>3</sub>; Me<sub>4</sub>Si) of (R)-3,3'-diiodo-2,2'-dimethoxy-1,1'-binaphthalene.

<sup>1</sup>H NMR:  $\delta_{\text{H}}$ (300 MHz; CDCl<sub>3</sub>; Me<sub>4</sub>Si) 3.42 (6H, s, 2 × OCH<sub>3</sub>), 7.07 (2H, d, *J* 8.4, C(8)*H*, C(8')*H*), 7.27 (2H, ddd, *J* 1.2 6.9 and 8.2, C(6)*H*, C(6')*H*), 7.41 (2H, ddd, *J* 1.2 6.9 and 8.1, C(7)*H*, C(7')*H*), 7.79 (2H, d, *J* 8.2, C(5)*H*, C(5')*H*), 8.53 (2H, s, C(4)*H*, C(4')*H*).  
mp 194-195 °C (lit.<sup>S5</sup> 189-193 °C).

**(R)-3,3'-Diiodo-1,1'-binaphthalene-2,2'-diol (8)**<sup>S6,S7</sup>

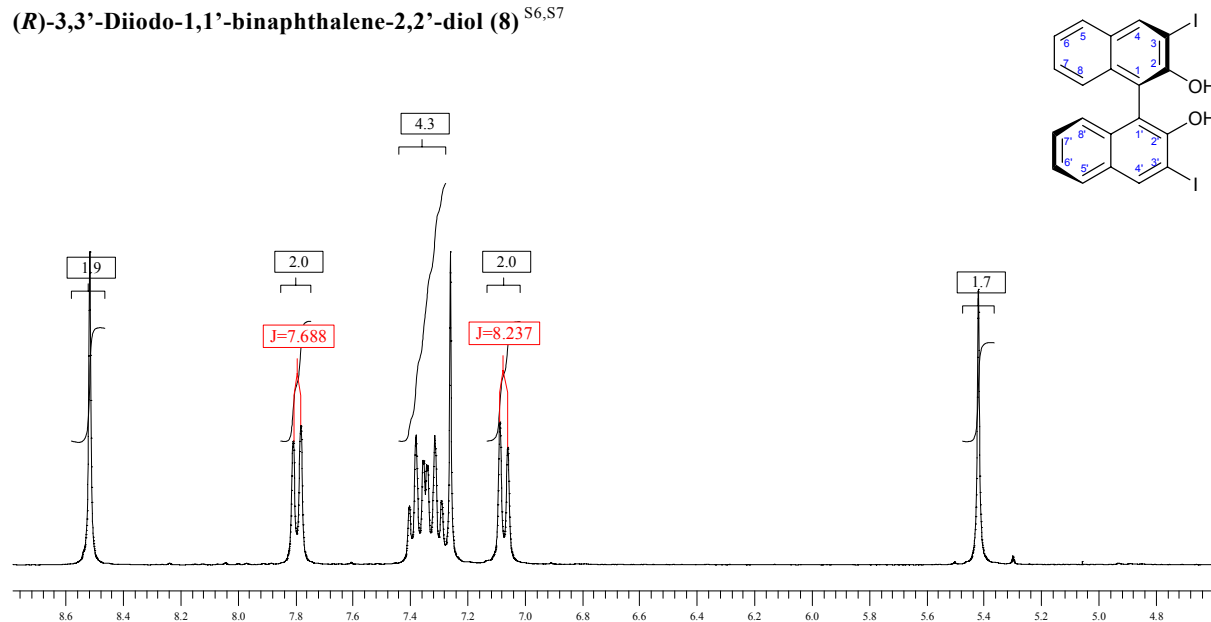

**Fig. S4** <sup>1</sup>H NMR(300 MHz; CDCl<sub>3</sub>; Me<sub>4</sub>Si) of compound (R)-8.

<sup>1</sup>H NMR:  $\delta_{\text{H}}$ (300 MHz; CDCl<sub>3</sub>; Me<sub>4</sub>Si) 5.42 (2H, bs, 2 × OH), 7.07 (2H, d, *J* 8.2, C(8)H, C(8')H), 7.31 (2H, ddd, *J* 1.3 6.9 and 8.2, C(6)H, C(6')H), 7.38 (2H, ddd, *J* 1.3 6.9 and 8.2, C(7)H, C(7')H), 7.79 (2H, d, *J* 7.7, C(5)H, C(5')H), 8.52 (2H, s, C(4)H, C(4')H).  
mp 312-315 °C (lit.<sup>S7</sup> 312-314 °C).

**(R)-3,3'-Bis(3-hydroxy-3,3-diphenylprop-1-en-1-yl)-1,1'-binaphthalene-2,2'-diol (9)**

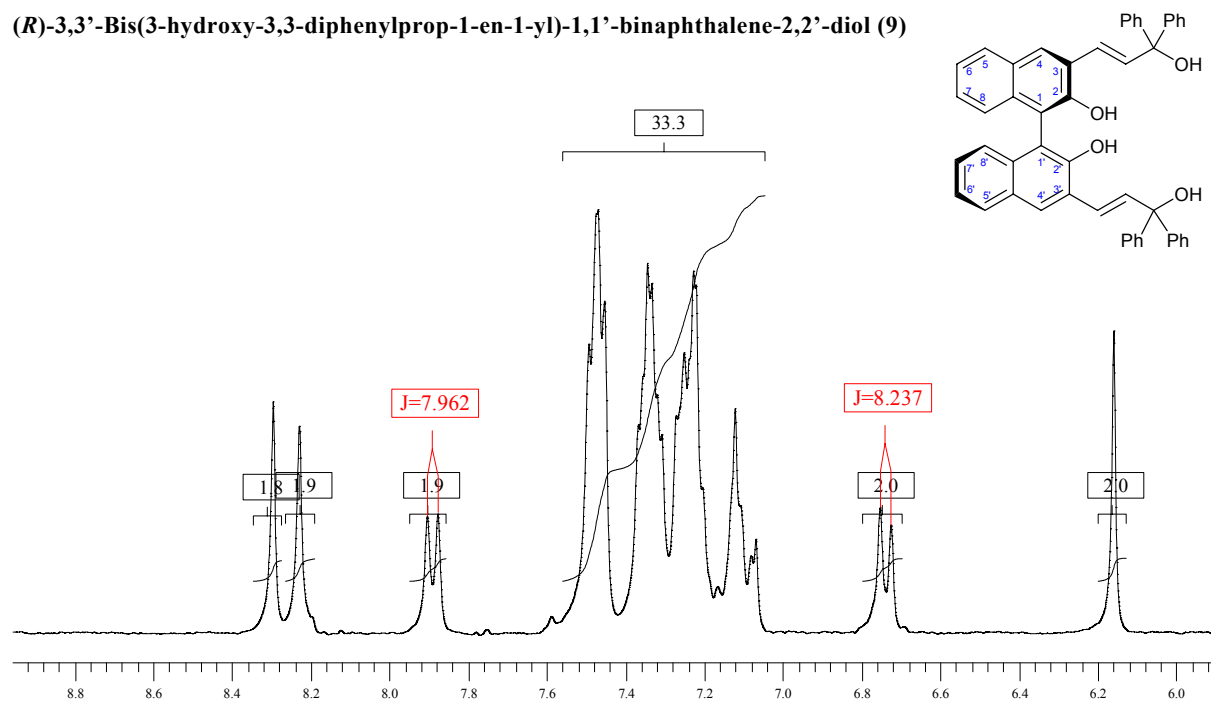

**Fig. S5** <sup>1</sup>H NMR(300 MHz; DMSO-d<sub>6</sub>; Me<sub>4</sub>Si) of compound (R)-9.

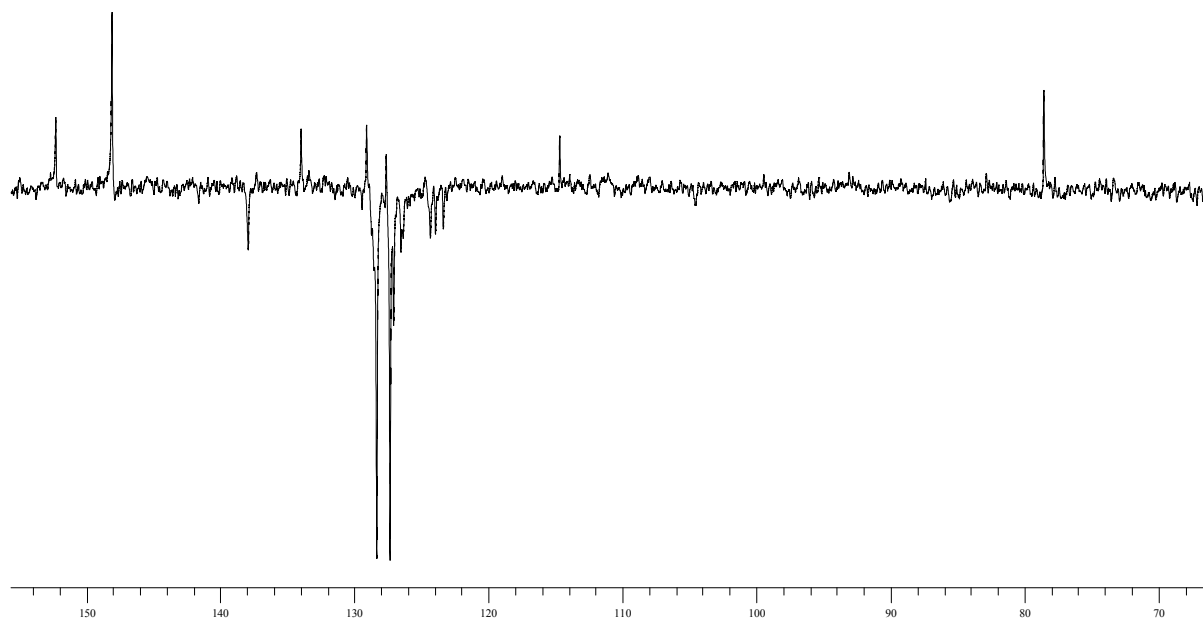

Fig. S6 <sup>13</sup>C NMR (75 MHz; DMSO-d<sub>6</sub>; Me<sub>4</sub>Si) of compound (R)-9.

**(R)-2,2,2',2'-Tetraphenyl-10,10'-bi(2H-naphtho[2,3-b]pyran) (5a)**

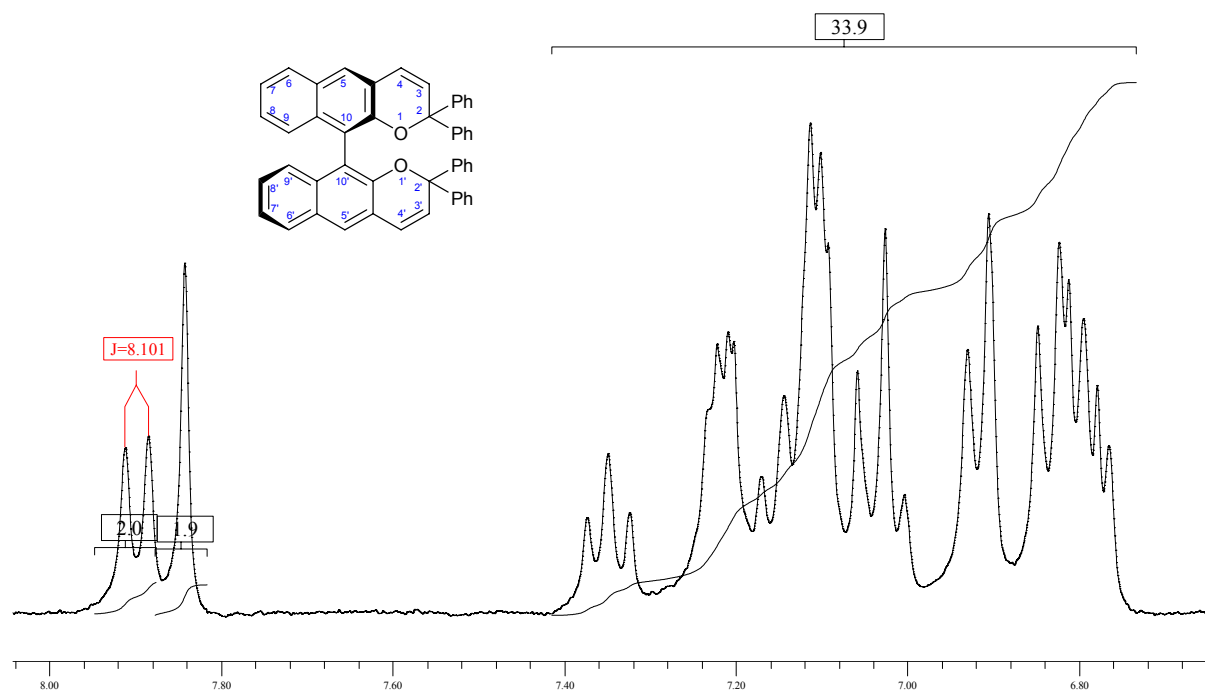

Fig. S7 <sup>1</sup>H NMR (300 MHz; DMSO-d<sub>6</sub>; Me<sub>4</sub>Si) of compound (R)-5a.

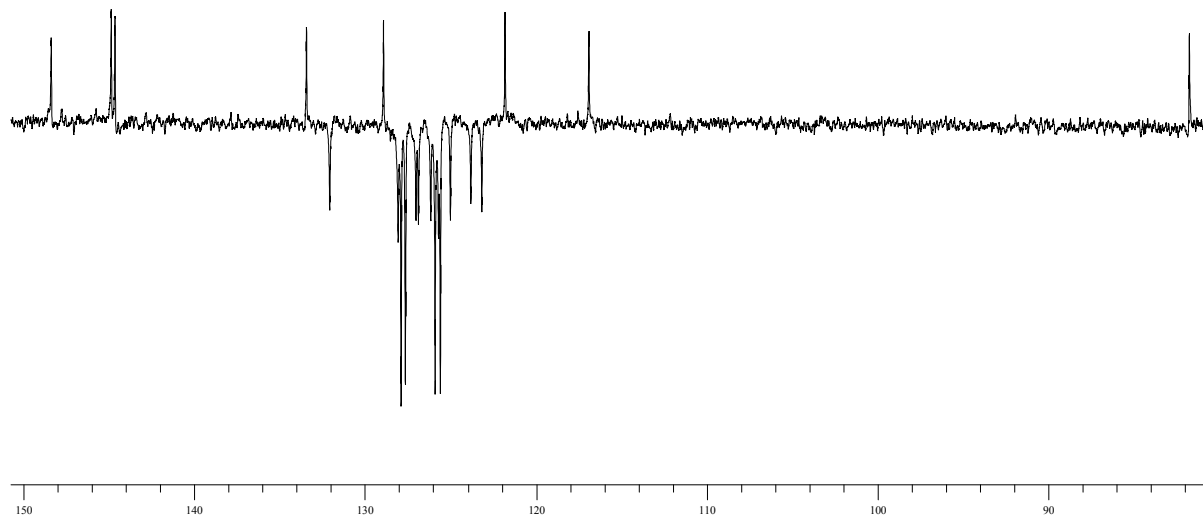

Fig. S8 <sup>13</sup>C NMR(75 MHz; DMSO-d<sub>6</sub>; Me<sub>4</sub>Si) of compound (*R*)-5a.

(*R*)-1-(2,2-Diphenyl-2*H*-naphtho[2,3-*b*]pyran-10-yl)-3-(3,3-diphenylprop-2-enylidene)naphthalen-2(3*H*)-one  
(5b):

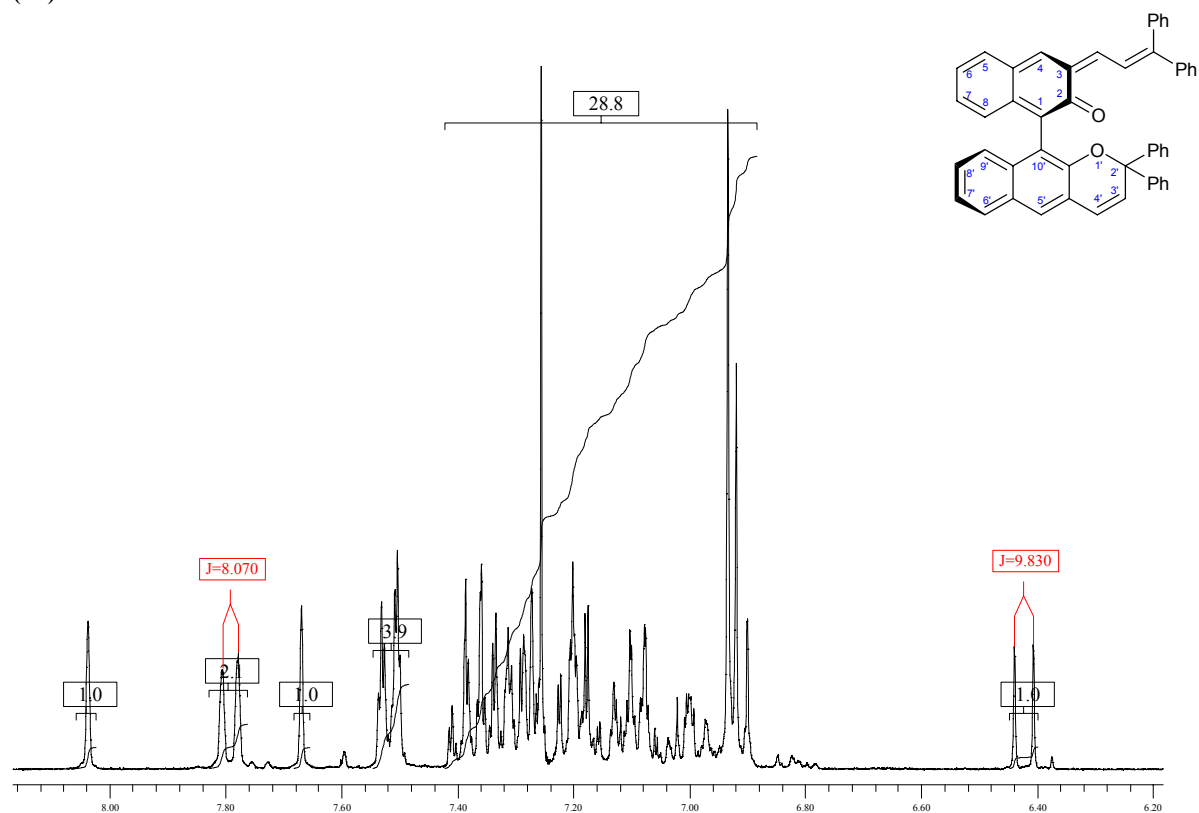

Fig. S9 <sup>1</sup>H NMR (300 MHz; CDCl<sub>3</sub>; Me<sub>4</sub>Si) of compound (*R*)-5b.

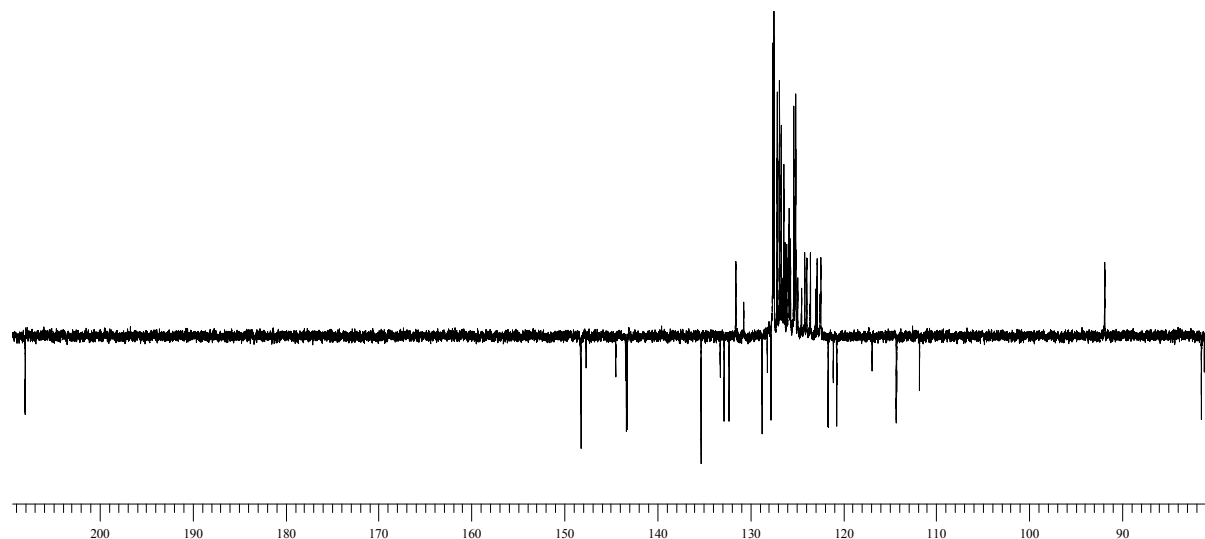

**Fig. S10** <sup>13</sup>C NMR (75 MHz; CDCl<sub>3</sub>; Me<sub>4</sub>Si) of mixture (*R*)-**5a** and (*R*)-**5b**.

### Switching in solution

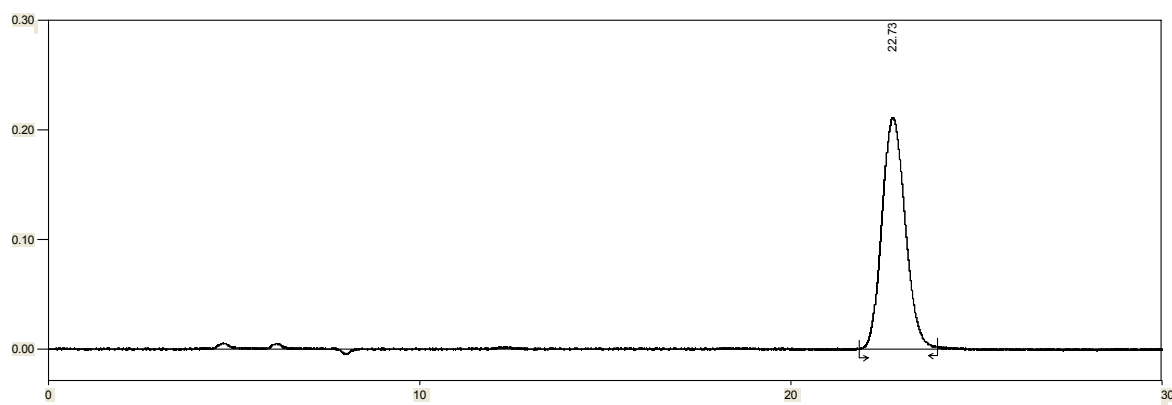

**Fig. S11** HPLC chromatogram of (*R*)-**5** in ground state:  $t_{(R)\text{-5a}} = 22.73$  min, 100%.

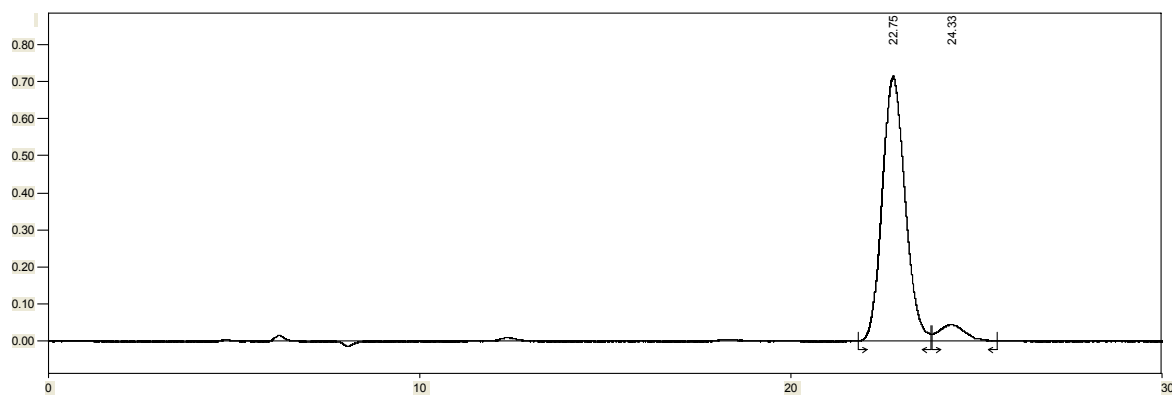

**Fig. S12** HPLC chromatogram of (*R*)-**5** in the first cycle: after irradiation at 313 nm for 5 minutes:  $t_{(R)\text{-5a}} = 22.75$  min, 93.36%;  $t_{(R)\text{-5b}} = 24.33$  min, 6.64%.

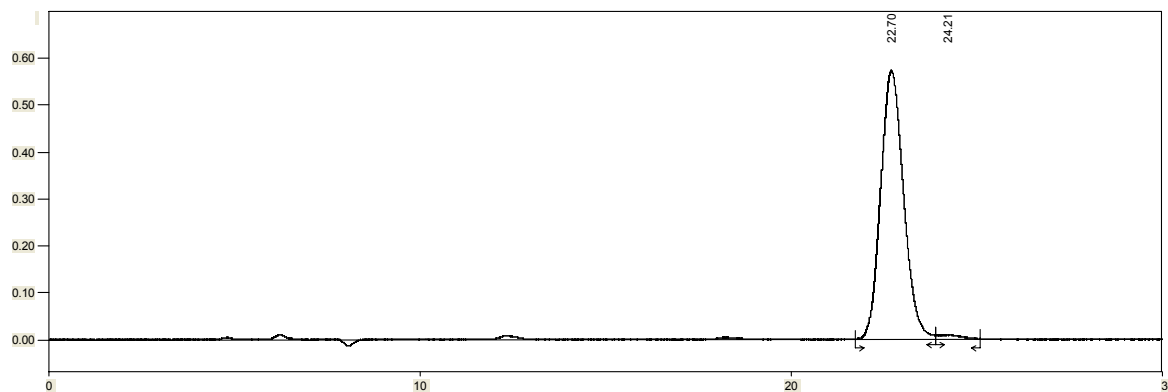

**Fig. S13** HPLC chromatogram of (*R*)-**5** in the first cycle: after heating at 84 °C for 5 minutes:  $t_{(R)-5a} = 22.70$  min, 99.64%;  $t_{(R)-5b} = 24.21$  min, 0.36%.

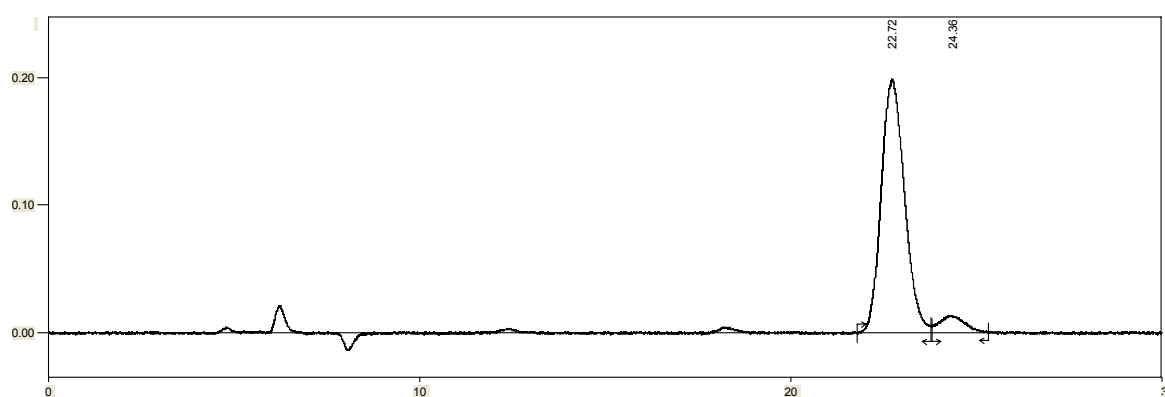

**Fig. S14** HPLC chromatogram of (*R*)-**5** in the second cycle: after irradiation at 313 nm for 5 minutes:  $t_{(R)-5a} = 22.72$  min, 93.55%;  $t_{(R)-5b} = 24.36$  min, 6.45%.

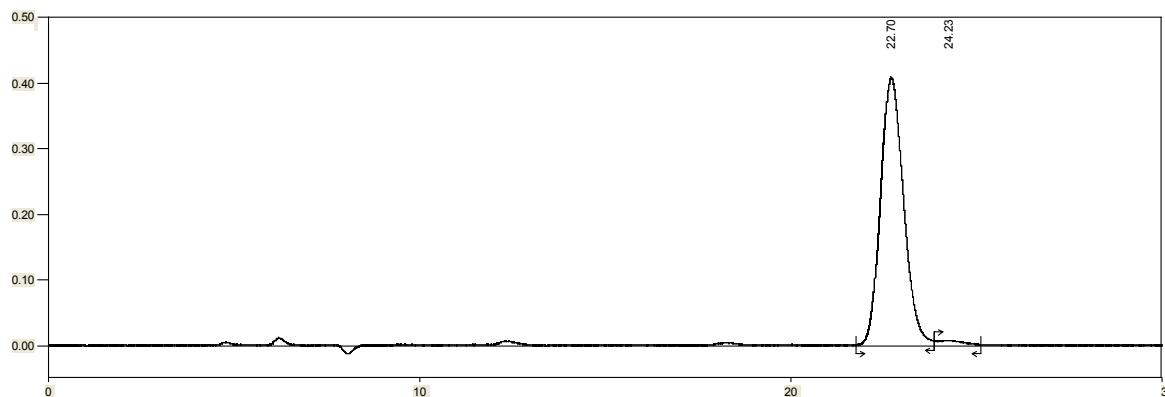

**Fig. S15** HPLC chromatogram of (*R*)-**5** in the second cycle: after heating at 84 °C for 5 minutes:  $t_{(R)-5a} = 22.70$  min, 99.57%;  $t_{(R)-5b} = 24.23$  min, 0.43%.

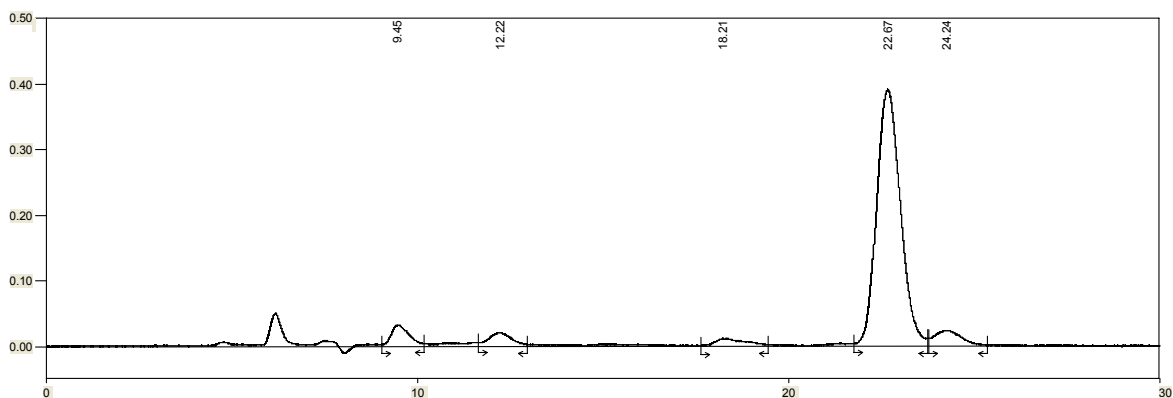

**Fig. S16** HPLC chromatogram of (*R*)-**5** in the tenth cycle: after irradiation at 313 nm for 5 minutes:  $t_{(R)-5a} = 22.67$  min, 84.46%;  $t_{(R)-5b} = 24.24$  min, 5.12% (9.45 min, 4.32%; 12.22 min., 3.34%; 18.21 min, 2.76%).

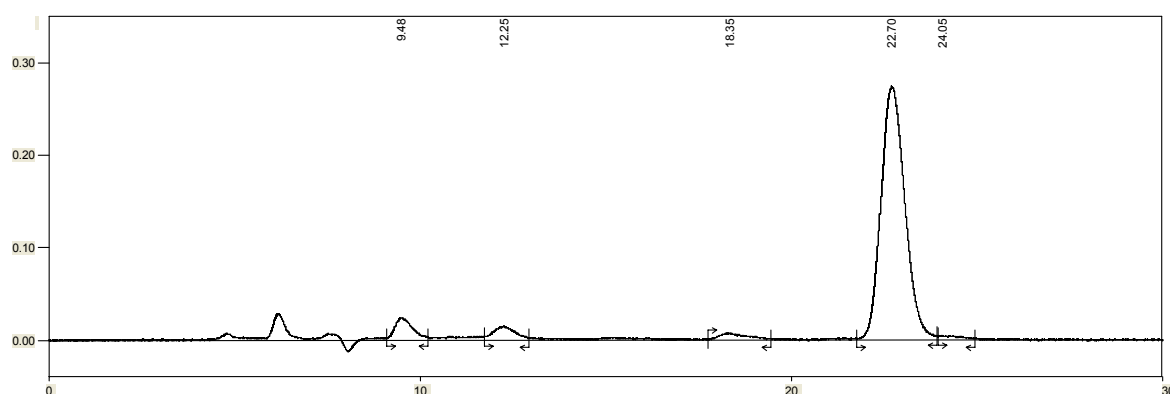

**Fig. S17** HPLC chromatogram of (*R*)-**5** in tenth cycle: after heating at 84 °C for 5 minutes:  $t_{(R)-5a} = 22.70$  min, 89.66%;  $t_{(R)-5b} = 24.05$  min, 0.31% (9.48 min, 4.87%; 12.25 min., 3.22%; 18.35 min, 1.95%).

**Table S1** Switching of the absorption intensity of (*R*)-**5** (sample irradiated/heated in d-benzene at  $c = 1.52 \times 10^{-2}$  M, diluted for measurement of absorbance by benzene to  $c = 3.5 \times 10^{-5}$  M) at 298 nm. Increase of the intensity after irradiation with UV light (313 nm) for 5 min., decrease after heating (84 °C) for 5 min..

| Cycle No. | Absorbance (AU) at 298 nm |
|-----------|---------------------------|
| 0         | 1.08                      |
| 0.5       | 1.10                      |
| 1         | 0.97                      |
| 1.5       | 1.09                      |
| 2         | 0.99                      |
| 2.5       | 1.10                      |
| 3         | 1.00                      |
| 3.5       | 1.10                      |
| 4         | 1.04                      |
| 4.5       | 1.11                      |
| 5         | 1.03                      |
| 5.5       | 1.10                      |
| 6         | 1.04                      |
| 6.5       | 1.12                      |
| 7         | 1.08                      |
| 7.5       | 1.12                      |
| 8         | 1.08                      |
| 8.5       | 1.12                      |
| 9         | 1.07                      |
| 9.5       | 1.10                      |
| 10        | 1.07                      |



## Kinetic measurements

### Switching proces (R)-5a → (R)-5b at 26.5 °C:

**Table S2** Calculated values of molar ratio of compound (R)-5a during irradiation sample in d-benzene at  $c = 1.52 \times 10^{-2}$  M in time at 26.5 °C.

| Time (min) | % (R)-5a | % (R)-5b | $x_{(R)-5a}$ | $\ln x_{(R)-5a}$ |
|------------|----------|----------|--------------|------------------|
| 1.5        | 96.63    | 3.37     | 0.97         | -0.03            |
| 5          | 93.36    | 6.64     | 0.94         | -0.06            |
| 8          | 89.42    | 10.58    | 0.90         | -0.10            |
| 10         | 87.94    | 12.06    | 0.89         | -0.12            |
| 12         | 86.7     | 13.3     | 0.87         | -0.13            |
| 14         | 85.68    | 14.32    | 0.87         | -0.14            |
| 16         | 82.69    | 17.31    | 0.84         | -0.18            |
| 18         | 81.96    | 18.04    | 0.83         | -0.19            |
| 20         | 81.68    | 18.32    | 0.83         | -0.19            |
| 40         | 67.11    | 32.89    | 0.69         | -0.38            |

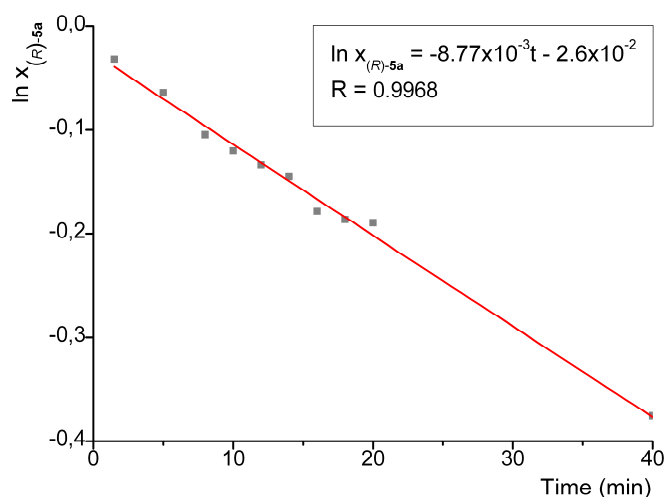

**Fig. S18** Dependence of natural logarithm of molar ratio of compound (R)-5a against time at 26.5 °C (apparent rate constant:  $k_1 = (8.77 \pm 0.25) \times 10^{-3} \text{ min}^{-1}$ , reaction half time:  $t_{1/2} = 79.0 \pm 2.3 \text{ min}$ ).

### Rate constant of reversed proces (R)-5b → (R)-5a at 14 °C:

**Table S3** Calculated values of molar ratio of compound (R)-5b in time at 14 °C (from the sample irradiated in d-benzene at  $c = 1.52 \times 10^{-2}$  M).

| Time (min) | % (R)-5a | % (R)-5b | $x_{(R)-5b}$ | $\ln x_{(R)-5b}$ |
|------------|----------|----------|--------------|------------------|
| 0          | 70.56    | 29.44    | 0.28         | -1.27            |
| 60         | 71.6     | 28.4     | 0.27         | -1.31            |
| 120        | 71.63    | 28.37    | 0.27         | -1.31            |
| 180        | 73.62    | 26.38    | 0.25         | -1.39            |
| 240        | 74.79    | 25.21    | 0.24         | -1.43            |
| 300        | 78.32    | 21.68    | 0.20         | -1.58            |
| 360        | 78.57    | 21.43    | 0.20         | -1.60            |
| 420        | 78.31    | 21.69    | 0.21         | -1.58            |

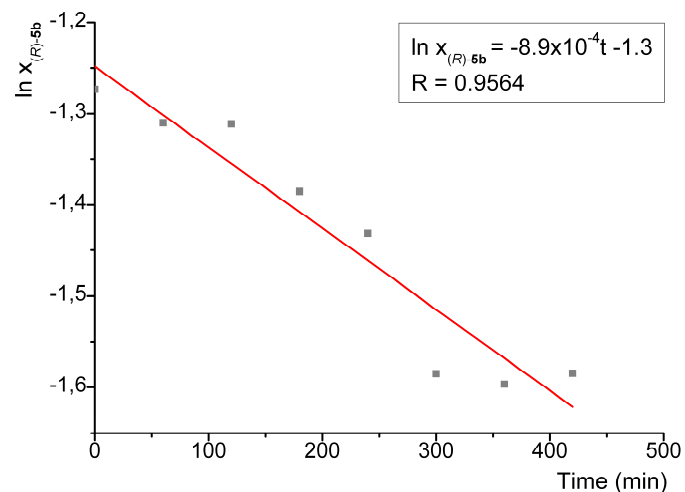

**Fig. S19** Dependence of natural logarithm of molar ratio of compound (*R*)-**5b** against time at 14 °C (rate constant:  $k_1 = (0.89 \pm 0.11) \times 10^{-3} \text{ min}^{-1}$ , half time of the reaction:  $t_{1/2} = (778.8 \pm 97.8) \text{ min}$ ).

**Rate constant of reversed proces (*R*)-**5b** → (*R*)-**5a** at 26.5 °C:**

**Table S4** Calculated values of molar ratio of compound (*R*)-**5b** in time at 26.5 °C (from the sample irradiated in d-benzene at  $c = 1.52 \times 10^{-2} \text{ M}$ ).

| Time (min) | % ( <i>R</i> )- <b>5a</b> | % ( <i>R</i> )- <b>5b</b> | $x_{(R)-5b}$ | $\ln x_{(R)-5b}$ |
|------------|---------------------------|---------------------------|--------------|------------------|
| 0          | 81.68                     | 18.32                     | 0.17         | -1.76            |
| 30         | 86.89                     | 13.11                     | 0.12         | -2.09            |
| 60         | 88.38                     | 11.62                     | 0.11         | -2.22            |
| 120        | 90.78                     | 9.22                      | 0.09         | -2.45            |
| 180        | 92.74                     | 7.26                      | 0.07         | -2.69            |
| 240        | 93.77                     | 6.23                      | 0.06         | -2.84            |
| 300        | 94.33                     | 5.67                      | 0.05         | -2.94            |

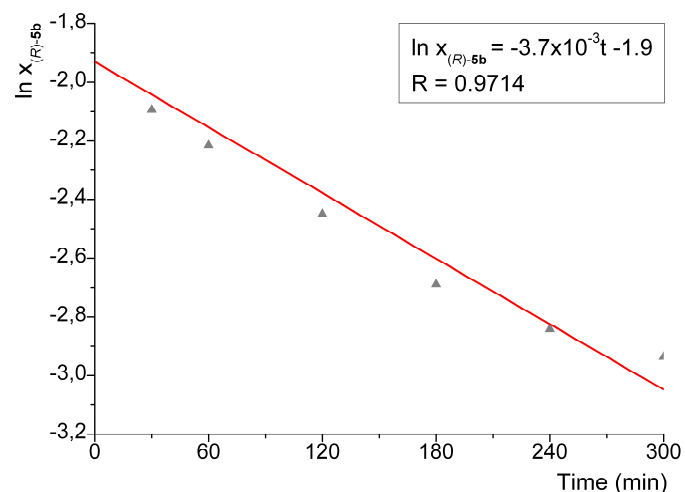

**Fig. S20** Dependence of natural logarithm of molar ratio of compound (*R*)-**5b** against time at 26.5 °C (rate constant:  $k_1 = (3.73 \pm 0.41) \times 10^{-3} \text{ min}^{-1}$ , half time of the reaction:  $t_{1/2} = (185.8 \pm 20.7) \text{ min}$ ).

**Rate constant of reversed proces (R)-5b → (R)-5a at 35 °C:**

**Table S5** Calculated values of molar ratio of compound (R)-5b in time at 35 °C  
 (from the sample irradiated in d-benzene at  $c = 1.52 \times 10^{-2}$  M).

| Time (min) | % (R)-5a | % (R)-5b | $x_{(R)-5b}$ | $\ln x_{(R)-5b}$ |
|------------|----------|----------|--------------|------------------|
| 0          | 72.78    | 27.22    | 0.26         | -1.35            |
| 15         | 74.54    | 25.46    | 0.24         | -1.42            |
| 30         | 75.89    | 24.11    | 0.23         | -1.48            |
| 45         | 78.7     | 21.3     | 0.20         | -1.60            |
| 60         | 79.79    | 20.21    | 0.19         | -1.66            |
| 75         | 81.13    | 18.87    | 0.18         | -1.73            |
| 90         | 83.95    | 16.05    | 0.15         | -1.89            |
| 105        | 87.94    | 12.06    | 0.11         | -2.18            |
| 120        | 88.09    | 11.91    | 0.11         | -2.19            |

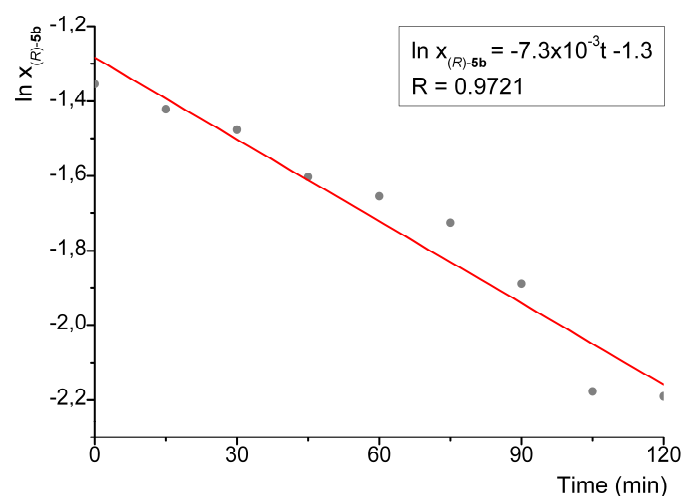

**Fig. S21** Dependence of natural logarithm of molar ratio of compound (R)-5b against time at 35 °C (rate constant:  $k_1 = (7.30 \pm 0.66) \times 10^{-3} \text{ min}^{-1}$ , half time of the reaction:  $t_{1/2} = (95.0 \pm 8.7) \text{ min}$ ).

**Activation free energy:**

**Table S6** Calculated values of natural logarithm of rate constants reversed reactions (R)-5b → (R)-5a at different temperatures.

| t (°C) | T (K)  | 1/T (1/K) | k (min <sup>-1</sup> ) | ln k (min <sup>-1</sup> ) |
|--------|--------|-----------|------------------------|---------------------------|
| 14     | 287.15 | 3.48E-03  | 0.89E-03               | -7.02                     |
| 26.5   | 299.65 | 3.34E-03  | 3.73E-03               | -5.59                     |
| 35     | 308.15 | 3.25E-03  | 7.30E-03               | -4.92                     |

From dependence of natural logarithm of rate constants reversed reaction against reciprocal values of temperature (**Fig. 3**; Arrhenius equation:  $\ln k = -8.96 \times 10^3/T + 24.2$ ) was estimated activation energy:  $E_A = 8.96 \times 10^3 \text{ K} \times R = 74.5 \pm 5.8 \text{ kJ mol}^{-1}$  and pre-exponential factor:  $A = e^{24.2} = 3.23 \times 10^{10} \text{ min}^{-1} = 5.39 \times 10^8 \text{ s}^{-1}$ .

## Switching in polymer film

**Table S7** Switching of the absorption intensity of (*R*)-**5** in PMMA film (concentration of irradiated/heated film  $c = 0.02$  mol/kg) at 296 nm. Increase of the intensity after irradiation with UV light (313 nm) for 1 h, decrease after heating (70 °C) for 8 min..

| Cycle No. | Absorbance (AU) at 296 nm |
|-----------|---------------------------|
| 0         | 1.31                      |
| 0.5       | 1.41                      |
| 1         | 1.29                      |
| 1.5       | 1.41                      |
| 2         | 1.29                      |
| 2.5       | 1.40                      |
| 3         | 1.30                      |
| 3.5       | 1.41                      |
| 4         | 1.29                      |
| 4.5       | 1.41                      |
| 5         | 1.29                      |
| 5.5       | 1.41                      |
| 6         | 1.29                      |
| 6.5       | 1.41                      |
| 7         | 1.30                      |
| 7.5       | 1.41                      |
| 8         | 1.30                      |
| 8.5       | 1.41                      |
| 9         | 1.30                      |
| 9.5       | 1.41                      |
| 10        | 1.30                      |

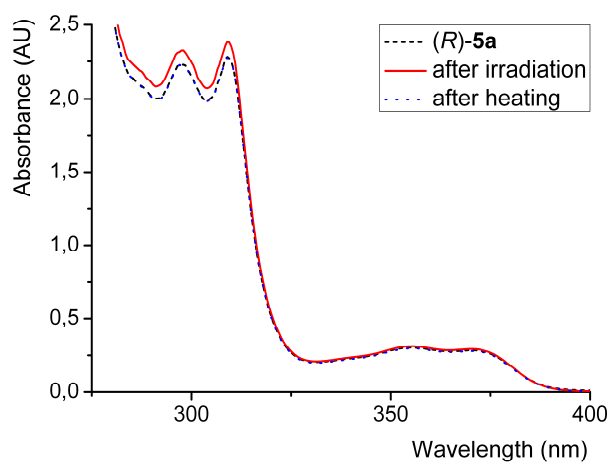

**Fig. S22** The absorption spectra of (*R*)-**5** in 50  $\mu\text{m}$  PS film (concentration of irradiated/heated film  $c = 0.02$  mol/kg), before and after irradiation with UV light (313 nm) for 1 h and after heating (70 °C) for 8 min.

**Table S8** Switching of the CD signal intensity of (*R*)-**5** in PS film (concentration of irradiated/heated film  $c = 0.02$  mol/kg) at 282 nm. Decrease of the intensity after irradiation with UV light (313 nm) for 1 h, increase after heating (70 °C) for 8 min..

| Cycle No. | CD (mdeg) at 282 nm |
|-----------|---------------------|
| 0         | -7.98               |
| 0.5       | -77.18              |
| 1         | -7.38               |
| 1.5       | -76.15              |
| 2         | -7.60               |
| 2.5       | -69.09              |
| 3         | -7.90               |
| 3.5       | -66.60              |
| 4         | -6.55               |
| 4.5       | -68.05              |
| 5         | -8.37               |
| 5.5       | -69.23              |
| 6         | -8.54               |
| 6.5       | -67.11              |
| 7         | -6.42               |
| 7.5       | -75.67              |
| 8         | -6.31               |
| 8.5       | -73.02              |
| 9         | -6.07               |
| 9.5       | -66.80              |
| 10        | -5.17               |

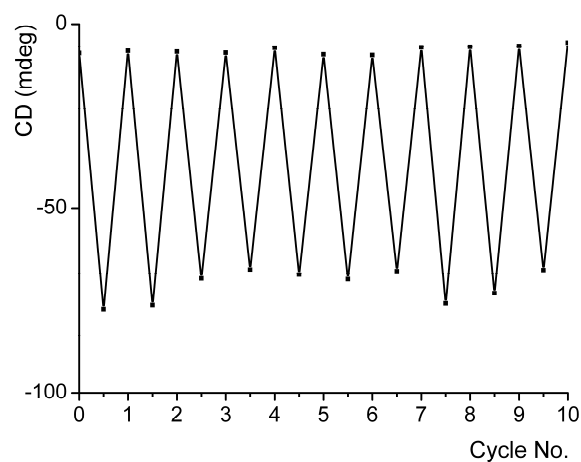

**Fig. S23** Switching of the CD signal intensity of (*R*)-**5** in 50  $\mu\text{m}$  PS film (0.02 mol/kg) at 282 nm. Decrease of the intensity after irradiation with UV light (313 nm) for 1 h, increase after heating (70 °C) for 8 min.

**Table S9** Switching of the CD signal intensity of (*R*)-**5** in PS film (concentration of irradiated/heated film  $c = 0.02$  mol/kg) at 308 nm. Increase of the intensity after irradiation with UV light (313 nm) for 1 h, decrease after heating (70 °C) for 8 min..

| Cycle No. | CD (mdeg) at 308 nm |
|-----------|---------------------|
| 0         | 17.25               |
| 0.5       | 132.28              |
| 1         | 16.14               |
| 1.5       | 128.82              |
| 2         | 15.20               |
| 2.5       | 118.80              |
| 3         | 15.62               |
| 3.5       | 116.63              |
| 4         | 13.02               |
| 4.5       | 119.45              |
| 5         | 16.77               |
| 5.5       | 124.16              |
| 6         | 18.56               |
| 6.5       | 119.32              |
| 7         | 11.31               |
| 7.5       | 126.06              |
| 8         | 14.31               |
| 8.5       | 125.74              |
| 9         | 12.36               |
| 9.5       | 116.71              |
| 10        | 8.85                |

## References

- S1 D. Cai, D. L. Hughes, T. R. Verhoeven and P. J. Reider, *Org. Synth.*, 1999, **76**, 1.  
S2 Q. S. Hu, D. Vitharana and L. Pu, *Tetrahedron: Asymmetry*, 1995, **6**, 2123.  
S3 D. S. Lingenfelter, R. C. Helgeson and D. J. Cram, *J. Org. Chem.*, 1981, **46**, 393.  
S4 Y. Meng, W. T. Slaven, D. Wang, T.-J. Liu, H.-F. Chow and C.-L. Li, *Tetrahedron: Asymmetry*, 1998, **9**, 3693.  
S5 L. Gobbi, P. Seiler, F. Diederich, V. Gramlich, *Helv. Chim. Acta*, 2000, **83**, 1711.  
S6 J. Hua and W. Lin, *Org. Lett.*, 2004, **6**, 861; Y. Yamashita, H. Ishitani, H. Shimizu and H. Kobayashi, *J. Am. Chem. Soc.*, 2002, **124**, 3292.  
S7 T. R. Wu, L. Shen and J. M. Chong, *Org. Lett.*, 2004, **6**, 2701.
